# Supplementary material for: Leveraging High-Frequency Clinical Data for Early Septic Shock Detection with Advanced Machine Learning Frameworks
Source: Research Square preprint supplement (doi:10.21203/rs.3.rs-7455197/v1), 2025-10-23
Supplement: Supplementary file 1 [file 2774563024e08dd2faed39ec.docx]

# **Supplementary Materials**

| Fold | Accuracy | AUC | Precision | | Recall | | Specificity | | F1-Score | |
| --- | --- | --- | --- | --- | --- | --- | --- | --- | --- | --- |
|  |  |  | Class 0 | Class 1 | Class 0 | Class  1 | Class 0 | Class  1 | Class 0 | Class  1 |
| 1 | 1.00 | 0.99 | 1.00 | 1.00 | 1.00 | 0.97 | 0.97 | 1.00 | 1.00 | 0.99 |
| 2 | 1.00 | 0.97 | 1.00 | 1.00 | 1.00 | 0.91 | 0.91 | 1.00 | 1.00 | 0.95 |
| 3 | 1.00 | 1.00 | 1.00 | 1.00 | 1.00 | 1.00 | 1.00 | 1.00 | 1.00 | 1.00 |
| 4 | 1.00 | 1.00 | 1.00 | 1.00 | 1.00 | 0.99 | 0.99 | 1.00 | 1.00 | 0.99 |
| 5 | 1.00 | 1.00 | 1.00 | 1.00 | 1.00 | 1.00 | 1.00 | 1.00 | 1.00 | 1.00 |

**Supplementary Table 1:** Performance analysis of 5-fold cross-validation using different metrics for 0.2 hour onset dataset.

| Fold | Accuracy | AUC | Precision | | Recall | | Specificity | | F1-Score | |
| --- | --- | --- | --- | --- | --- | --- | --- | --- | --- | --- |
|  |  |  | Class 0 | Class 1 | Class 0 | Class  1 | Class 0 | Class  1 | Class 0 | Class  1 |
| 1 | 1.00 | .99 | 1.00 | .96 | 1.00 | .98 | .98 | 1.00 | 1.00 | .97 |
| 2 | 1.00 | 1.00 | 1.00 | .98 | 1.00 | .92 | .92 | 1.00 | 1.00 | .95 |
| 3 | 1.00 | .99 | 1.00 | .98 | 1.00 | .97 | .97 | 1.00 | 1.00 | .97 |
| 4 | 1.00 | 1.00 | 1.00 | .98 | 1.00 | .97 | .97 | 1.00 | 1.00 | .98 |
| 5 | 1.00 | .99 | 1.00 | .99 | 1.00 | .96 | .96 | 1.00 | 1.00 | .97 |

**Supplementary Table 2:** Performance analysis of 5-fold cross-validation using different metrics for 0.4 hour onset dataset.

| Fold | Accuracy | AUC | Precision | | Recall | | Specificity | | F1-Score | |
| --- | --- | --- | --- | --- | --- | --- | --- | --- | --- | --- |
|  |  |  | Class 0 | Class 1 | Class 0 | Class  1 | Class 0 | Class  1 | Class 0 | Class  1 |
| 1 | 1.00 | .99 | 1.00 | .96 | 1.00 | .96 | .96 | 1.00 | 1.00 | .96 |
| 2 | 1.00 | 1.00 | 1.00 | .97 | 1.00 | .96 | .96 | 1.00 | 1.00 | .96 |
| 3 | 1.00 | .99 | 1.00 | .93 | 1.00 | .95 | .95 | 1.00 | 1.00 | .94 |
| 4 | 1.00 | .99 | 1.00 | .97 | 1.00 | .94 | .94 | 1.00 | 1.00 | .96 |
| 5 | 1.00 | .99 | 1.00 | .98 | 1.00 | .96 | .96 | 1.00 | 1.00 | .97 |

**Supplementary Table 3:** Performance analysis of 5-fold cross-validation using different metrics for 0.6 hour onset dataset.

| Fold | Accuracy | AUC | Precision | | Recall | | Specificity | | F1-Score | |
| --- | --- | --- | --- | --- | --- | --- | --- | --- | --- | --- |
|  |  |  | Class 0 | Class 1 | Class 0 | Class  1 | Class 0 | Class  1 | Class 0 | Class  1 |
| 1 | 1.00 | 1.00 | 1.00 | .96 | 1.00 | .99 | .99 | 1.00 | 1.00 | .98 |
| 2 | 1.00 | 1.00 | 1.00 | .91 | 1.00 | .96 | .96 | 1.00 | 1.00 | .94 |
| 3 | 1.00 | 1.00 | 1.00 | .88 | 1.00 | .93 | .93 | 1.00 | 1.00 | .90 |
| 4 | 1.00 | 1.00 | 1.00 | .95 | 1.00 | .97 | .97 | 1.00 | 1.00 | .96 |
| 5 | 1.00 | 1.00 | 1.00 | .96 | 1.00 | .97 | .97 | 1.00 | 1.00 | .97 |

**Supplementary Table 4:** Performance analysis of 5-fold cross-validation using different metrics for 0.8 hour onset dataset.

**Supplementary Table 5:** Performance analysis of 5-fold cross-validation using different metrics for 1 hour onset dataset.


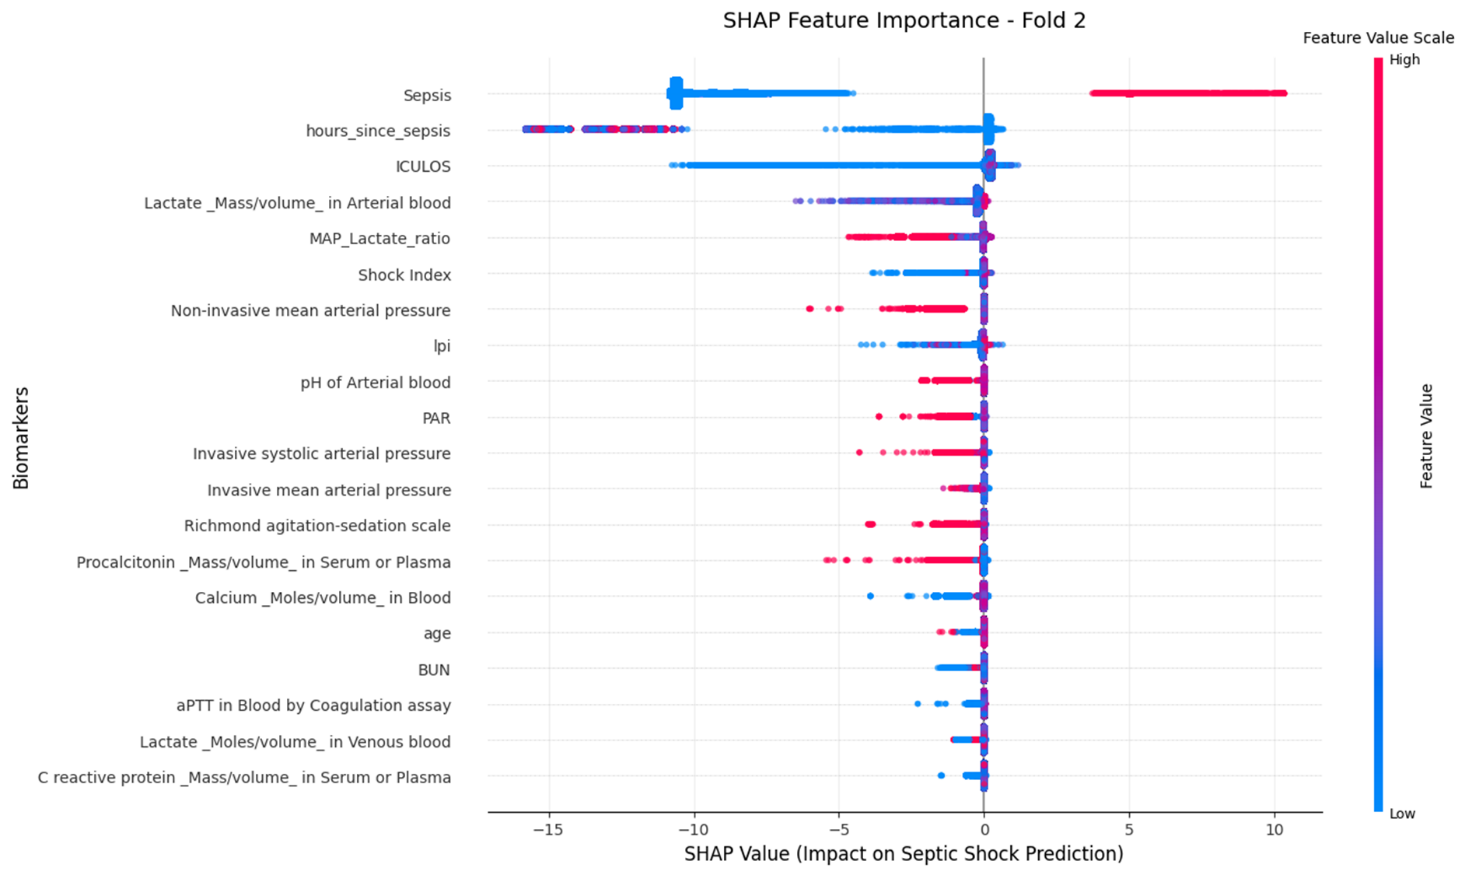


| Fold | Accuracy | AUC | Precision | | Recall | | Specificity | | F1_Score | |
| --- | --- | --- | --- | --- | --- | --- | --- | --- | --- | --- |
|  |  |  | Class 0 | Class 1 | Class 0 | Class  1 | Class 0 | Class 1 | Class 0 | Class  1 |
| 1 | 1.00 | 1.00 | 1.00 | .94 | 1.00 | .99 | .99 | 1.00 | 1.00 | .97 |
| 2 | 1.00 | 1.00 | 1.00 | .90 | 1.00 | .95 | .95 | 1.00 | 1.00 | .92 |
| 3 | 1.00 | 1.00 | 1.00 | .86 | 1.00 | .95 | .95 | 1.00 | 1.00 | .90 |
| 4 | 1.00 | 1.00 | 1.00 | .96 | 1.00 | .99 | .99 | 1.00 | 1.00 | .97 |
| 5 | 1.00 | 1.00 | 1.00 | .91 | 1.00 | .98 | .98 | 1.00 | 1.00 | .94 |

Supplementary Figure 1: SHAP summary plot for fold 2 illustrating the contribution of the top features to the septic shock prediction.


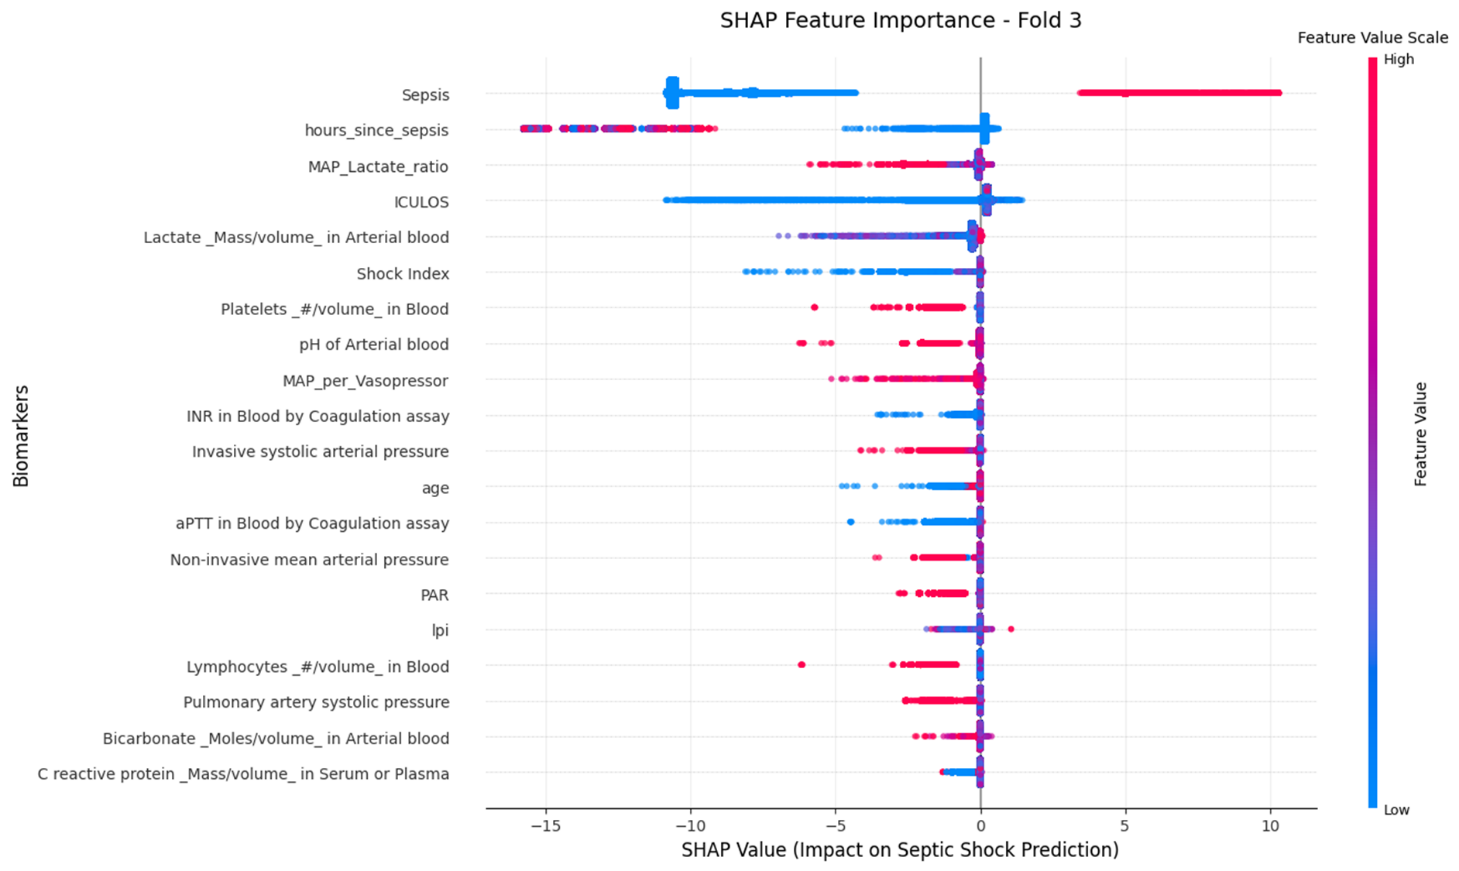


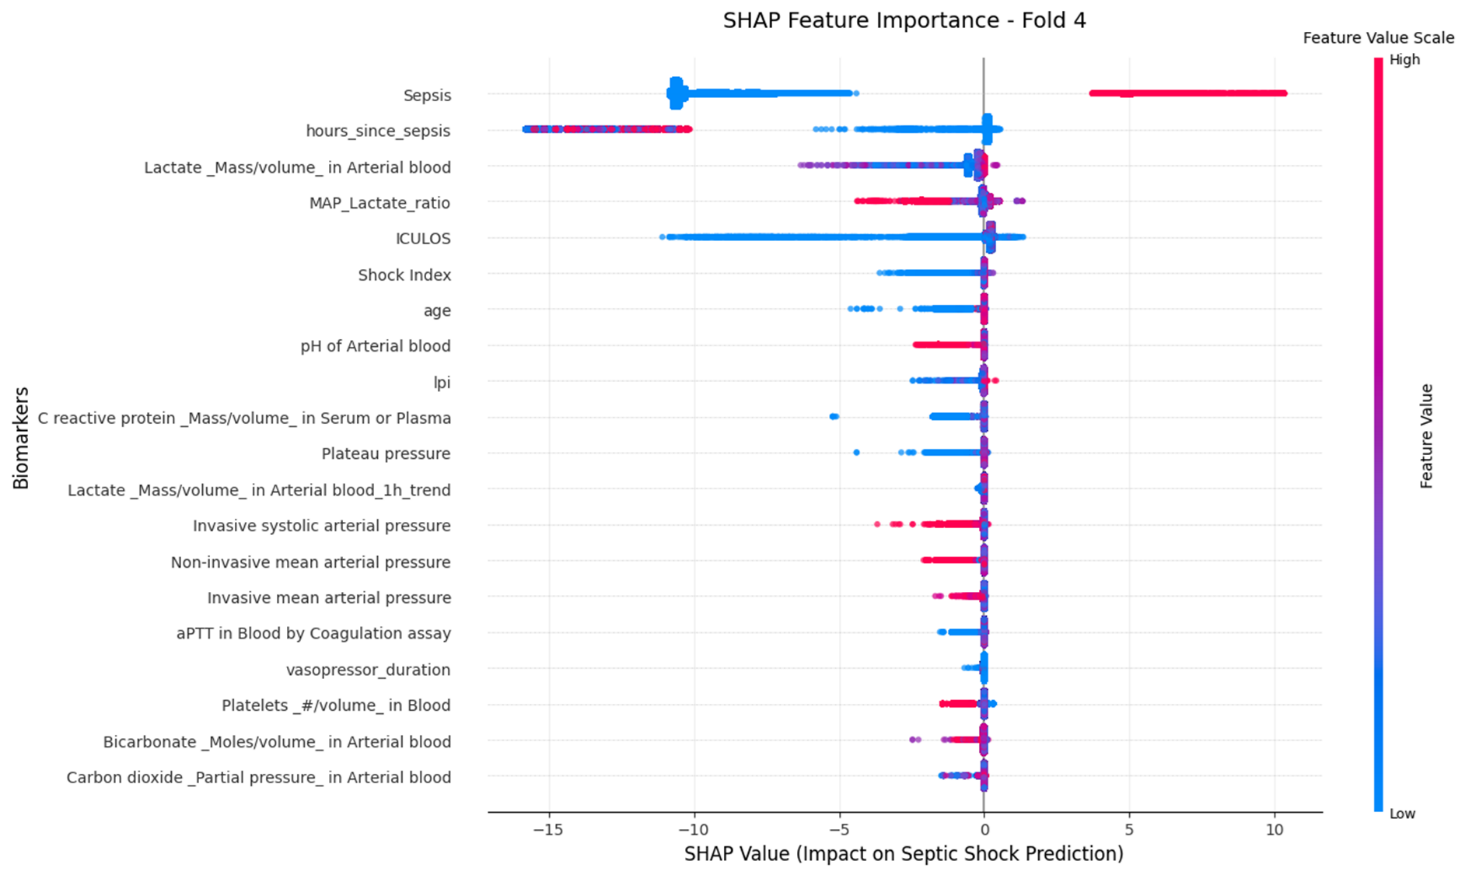
Supplementary Figure 2: SHAP summary plot for fold 3 illustrating the contribution of the top features to the septic shock prediction.

Supplementary Figure 3: SHAP summary plot for fold 4 illustrating the contribution of the top features to the septic shock prediction.


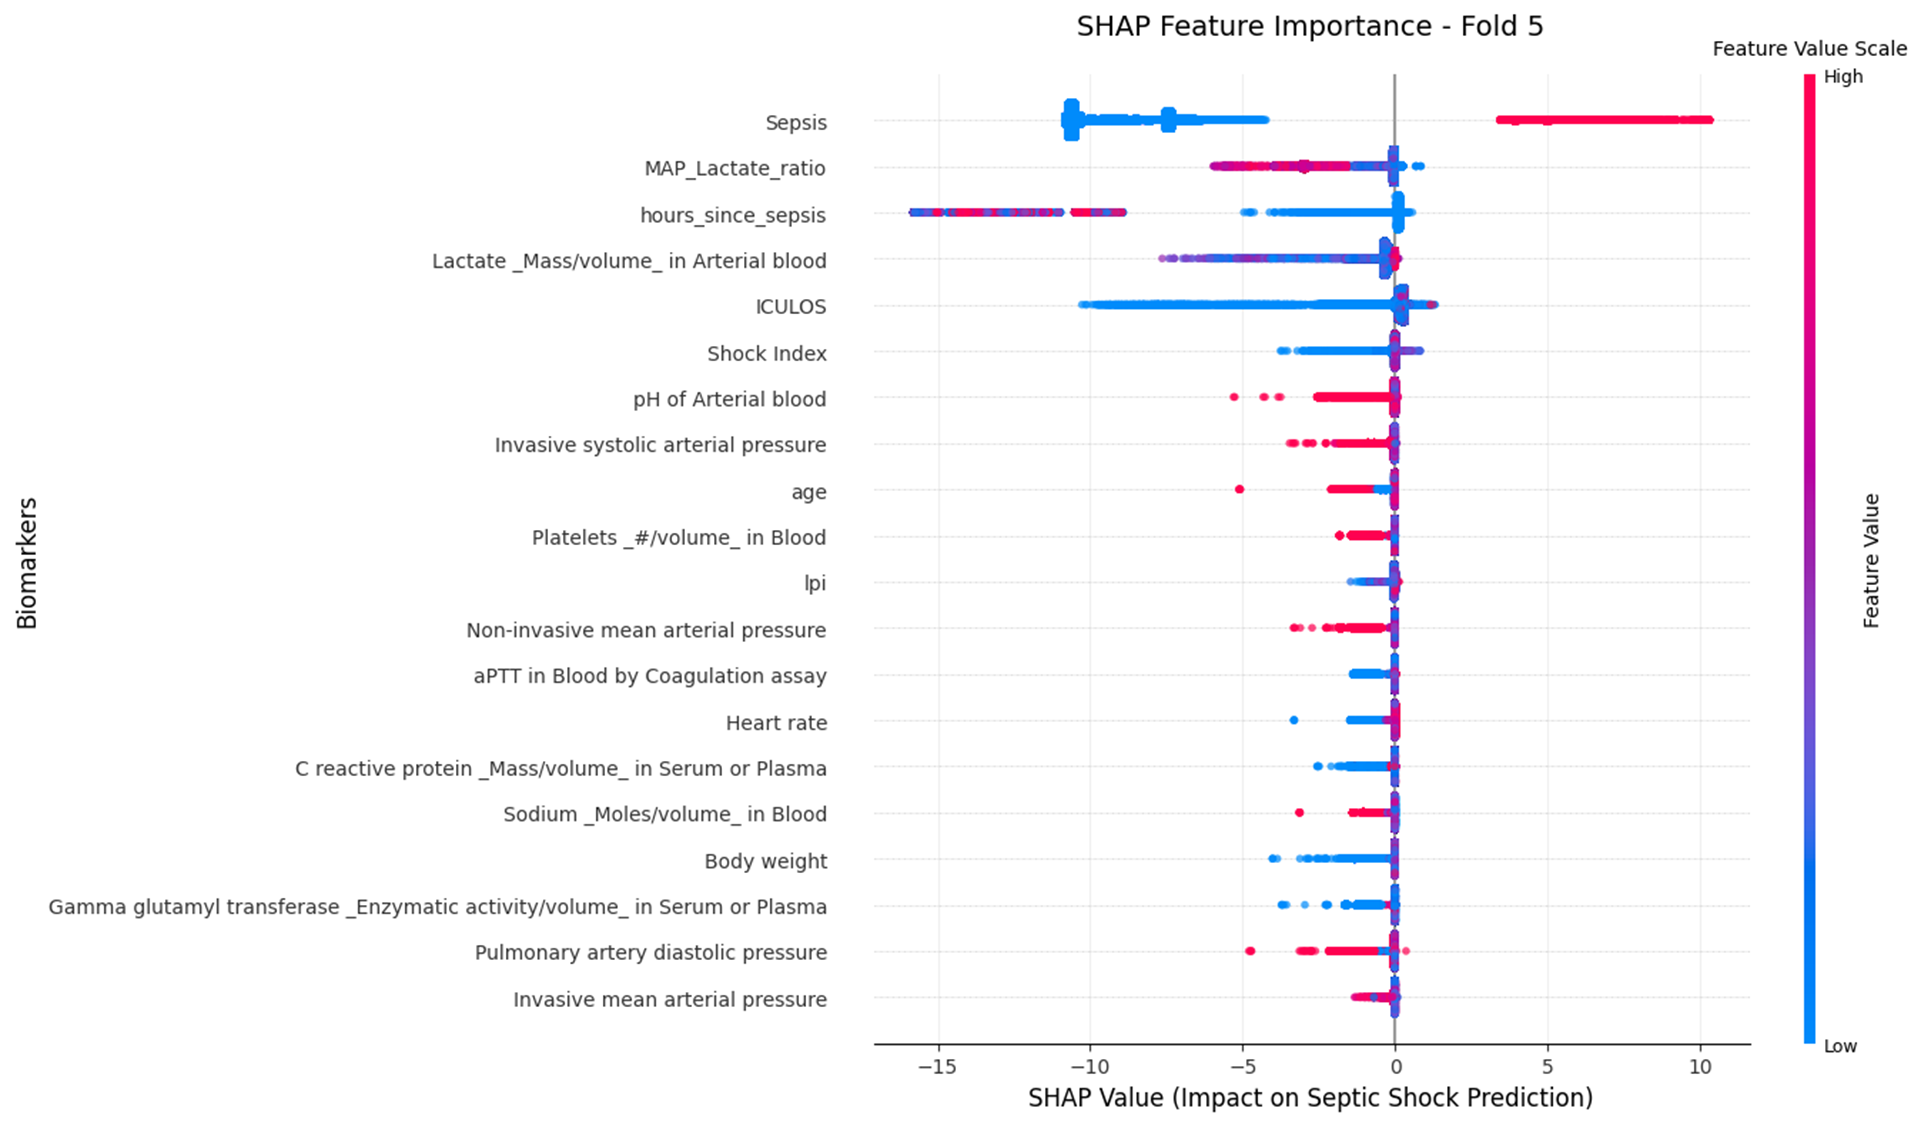


Supplementary Figure 4: SHAP summary plot for fold 5 illustrating the contribution of the top features to the septic shock prediction.

**List of features for ablation study:**

*Observation Features:* 'Heart rate','Pulmonary artery diastolic pressure','Pulmonary artery systolic pressure','Invasive systolic arterial pressure','Invasive mean arterial pressure','Non-invasive mean arterial pressure','Body weight','Carbon dioxide _Partial pressure_ in Arterial blood','C reactive protein _Mass/volume_ in Serum or Plasma','Lactate _Moles/volume_ in Venous blood','Lactate _Mass/volume_ in Arterial blood','Sepsis','INR in Blood by Coagulation assay','Calcium _Moles/volume_ in Blood','Platelets _#/volume_ in Blood','Ventilator rate','Lactate _Mass/volume_ in Arterial blood_1h_trend','pH of Arterial blood','Lymphocytes _#/volume_ in Blood','aPTT in Blood by Coagulation assay','Richmond agitation-sedation scale','Phosphate _Moles/volume_ in Blood','Bicarbonate _Moles/volume_ in Arterial blood','Sodium _Moles/volume_ in Blood','Gamma glutamyl transferase _Enzymatic activity/volume_ in Serum or Plasma','Procalcitonin _Mass/volume_ in Serum or Plasma','Alkaline phosphatase _Enzymatic activity/volume_ in Blood','Plateau pressure'.

*Pharma Features:* 'MAP_per_Vasopressor', 'vasopressor_duration'.

*Demographic Features:* 'age'

*Derived Features:* 'ICULOS', 'lpi', 'hours_since_sepsis', 'BUN', 'Shock Index', 'PAR', 'MAP_Lactate_ratio'.
